# Supplementary material for: Effects of the visual-feedback-based force platform training with functional electric stimulation on the balance and prevention of falls in older adults: a randomized controlled trial
Source: PeerJ. 2018 Jan 12;6:e4244. doi: 10.7717/peerj.4244 (PMC5768172; doi:10.7717/peerj.4244)
Supplement: Supplemental Information 1 [file peerj-06-4244-s001.xlsx]

## Sheet: Sheet1
Group	Age	Gender	BMI	Systolic BP	Diastolic BP	Drug	Faller	MMSE	HAMD	HAMA	BI-B	BI-P	BBS-B	BBS-P	FES-I-B	FES-I-P	MML-O-B	MML-O-P	MAP-O-B	MAP-O-I	MML-C-B	MML-C-P	MAP-C-B	MAP-C-P	Faller	Injuroius faller	Fall
I	81	F	26	159	76	4	Y	26	9	12	98	98	37	49	24	17	4.817	2.1	2.076	2.263	2.611	0.601	4.088	2.906	Y	Y	2
C	69	M	19.7	162	83	3	N	26	12	14	89	89	47	47	27	32	2.777	2.241	2.545	1.877	1.228	1.002	3.15	1.272	N	N	0
C	66	M	28.2	131	85	7	N	28	9	10	98	94	41	44	33	33	4.38	2.086	2.65	2.326	3.563	0.872	2.465	1.587	N	N	0
I	68	F	25	159	73	2	Y	27	13	16	96	99	49	49	20	24	2.84	2.124	2.959	1.096	1.63	0.7	2.294	1.587	N	N	0
C	77	F	25.7	128	73	5	Y	30	7	10	97	100	38	48	35	25	3.985	3.125	1.585	1.882	1.289	0.961	1.778	1.451	Y	Y	2
C	63	M	25	162	79	5	N	27	14	18	97	100	46	54	47	26	2.234	3.031	1.4	1.569	1.44	0.722	1.457	1.375	N	N	0
I	73	F	26.9	142	90	6	Y	25	8	8	97	99	49	51	41	23	3.022	2.138	2.66	1.187	1.051	0.752	1.929	2.141	N	N	0
I	67	M	22.3	156	79	8	N	27	11	15	90	96	56	56	40	21	3.073	1.984	1.982	0.534	1.063	0.706	2.525	2.464	N	N	0
C	79	F	27.2	164	99	6	Y	27	7	15	97	100	44	51	29	21	3.997	3.055	2.466	2.189	2.84	0.405	2.095	1.308	Y	Y	2
I	70	F	22.4	156	92	7	N	26	6	18	97	100	41	48	31	25	3.433	1.982	2.806	1.238	1.993	0.731	3.24	2.203	N	N	0
I	77	F	21.4	158	97	8	Y	27	9	11	97	100	39	48	32	21	4.467	2.132	1.813	2.279	3.043	0.536	2.193	2.185	N	N	0
I	73	M	30.5	140	66	5	N	26	5	10	90	96	55	53	24	24	5.17	2.939	2.517	0.661	1.718	1.022	2.773	1.592	N	N	0
I	60	M	23.3	157	99	10	N	27	8	12	97	100	51	51	44	16	3.68	2.389	2.919	2.493	0.919	0.561	3.346	1.537	N	N	0
C	74	F	24.2	155	86	3	Y	24	15	16	95	100	48	51	30	25	4.698	3.886	2.326	1.934	2.67	0.88	2.259	2.252	N	N	0
I	72	F	25.4	125	67	3	N	27	19	19	96	100	50	53	18	24	4.99	1.977	1.824	0.979	1.071	0.485	3.155	1.505	N	N	0
C	77	M	30.4	110	80	3	Y	27	11	18	92	94	47	50	44	31	2.682	2.667	3.303	1.839	2.422	1.165	2.468	2.768	Y	Y	2
I	68	F	25.1	137	88	4	N	26	8	14	96	100	40	53	39	27	6.421	1.941	2.295	0.718	2.26	0.926	3.17	2.365	N	N	0
C	69	M	22.4	135	85	4	N	26	5	10	96	99	50	52	21	10	2.733	3.285	2.166	1.884	1.444	1.201	2.157	1.946	N	N	0
I	68	F	17.7	152	87	6	N	26	7	17	96	100	36	44	32	21	4.102	2	2.962	0.172	2.836	0.965	3.701	1.851	N	N	0
C	61	M	25.8	157	86	6	N	27	8	13	97	99	50	52	36	20	4.699	2.698	2.797	1.66	0.587	0.732	2.78	1.53	N	N	0
C	66	M	21.3	150	97	7	N	26	9	11	96	97	47	47	33	28	3.305	3.007	2.989	1.964	0.357	1.491	2.532	2.34	N	N	0
C	65	M	22.9	146	76	7	N	27	10	14	96	97	40	47	36	37	3.558	2.61	2.874	1.953	1.11	1.098	2.173	1.123	N	N	0
I	64	M	25.9	160	67	3	N	24	8	13	92	100	43	46	36	26	4.399	1.847	2.243	2.536	3.012	0.743	4.783	2.032	N	N	0
C	74	F	20.2	138	85	8	N	30	10	11	96	97	47	47	51	21	4.189	2.593	1.512	1.922	0.286	1.824	3.239	2.809	N	N	0
C	77	F	21.9	154	66	7	Y	24	4	14	95	95	41	43	26	31	3.423	2.368	2.678	1.719	1.678	0.819	3.137	1.483	Y	Y	1
I	68	F	19.6	130	81	9	N	30	7	15	91	91	42	48	26	14	3.855	1.934	2.78	1.974	1.731	1.141	1.645	1.567	N	N	0
I	70	F	27.8	137	77	4	N	26	17	10	95	98	48	51	19	28	3.748	2.107	3.759	1.853	1.806	0.83	1.46	1.415	N	N	0
C	76	M	28.6	163	85	4	Y	28	12	8	95	95	48	47	53	19	4.036	2.946	1.895	1.718	3.871	1.044	2.25	1.99	Y	N	2
I	64	M	26.1	156	93	5	N	27	10	13	86	87	45	48	32	28	5.69	2.727	2.658	1.188	2.189	1.126	3.762	3.038	N	N	0
C	80	F	26.3	149	82	4	Y	25	13	11	95	97	43	44	17	13	2.77	2.441	4.091	1.793	1.331	1.089	3.308	3.21	Y	Y	2
I	77	F	29.2	159	74	5	Y	27	10	15	95	100	40	49	44	27	3.383	2.004	3.412	2.028	1.707	0.834	2.263	2.229	N	N	0
I	68	F	22.3	159	96	6	Y	26	6	8	94	95	43	46	21	21	2.091	1.939	2.736	0.564	1.69	0.537	2.218	1.958	N	N	0
C	73	F	26	133	76	5	Y	26	7	13	95	95	39	47	25	19	3.576	2.895	2.012	1.952	2.25	1.12	2.357	1.671	N	N	0
C	68	M	22.8	159	85	5	N	27	2	7	95	97	52	53	34	32	4.247	2.436	3.898	1.998	2.463	1.144	2.595	2.148	N	N	0
I	73	F	22.5	159	71	6	Y	26	11	17	95	100	51	52	32	17	4.102	1.397	3.909	1.593	2.795	1.095	2.465	1.966	N	N	0
C	68	M	22.8	158	74	6	N	27	8	14	95	97	41	49	38	34	3.286	2.499	1.805	1.788	2.582	1.897	3.617	3.008	N	N	0
I	71	F	27.5	149	67	6	N	28	11	18	96	96	42	51	30	20	5.153	2.403	2.867	1.669	2.398	1.266	2.468	1.812	N	N	0
C	70	M	22.1	183	83	6	N	29	8	15	95	96	48	52	38	28	3.987	2.848	1.436	1.752	1.359	1.364	1.917	1.838	N	N	0
I	60	M	25.1	153	88	7	N	27	10	21	98	100	41	59	20	21	4.302	1.9	2.678	0.391	2.025	1.057	2.253	2.56	N	N	0
C	69	F	24	137	90	7	N	28	14	10	95	96	44	45	26	26	4.287	2.516	2.117	1.577	0.958	1.161	2.511	1.84	N	N	0
C	73	F	26.9	139	84	8	Y	27	16	11	95	95	43	43	27	15	3.316	2.532	3.016	1.891	2.244	0.261	3.636	3.17	N	N	0
C	71	M	25.3	157	81	10	N	28	13	10	95	92	46	51	38	35	2.573	2.422	2.461	2.054	0.153	0.182	3.184	2.753	N	N	0
I	63	M	24.6	159	82	1	N	30	13	17	94	93	55	55	28	11	3.102	1.691	2.729	0.61	1.366	0.683	1.024	2.004	N	N	0
I	68	M	18.1	116	78	2	N	25	10	12	94	95	45	54	42	13	4.663	2.15	2.284	0.634	1.78	1.271	3.708	1.202	N	N	0
C	71	F	21.3	159	84	6	N	30	12	16	93	94	47	47	35	30	2.996	2.515	2.591	1.856	1.737	1.772	2.169	2.127	N	N	0
I	67	M	23.5	159	90	4	Y	27	9	6	94	94	49	51	33	20	3.782	2.104	2.611	0.929	1.96	0.876	1.731	1.888	N	N	0
I	62	M	29.2	122	65	4	N	30	11	9	94	98	44	51	33	8	3.047	1.845	2.244	0.738	1.714	0.906	3.182	2.102	N	N	0
C	67	M	25	132	84	4	N	25	15	14	94	95	52	52	30	27	3.224	2.021	2.634	1.766	0.847	1.854	1.018	1.966	N	N	0
I	60	M	25.6	142	90	5	N	28	12	12	94	96	45	46	40	29	4.374	1.863	2.633	0.367	2.161	0.807	2.291	2.041	N	N	0
C	75	F	25.2	157	62	5	N	28	8	21	94	95	35	43	32	30	3.523	2.409	2.048	1.944	1.033	1.034	3.576	3.411	Y	N	1
C	65	M	28.6	157	90	5	N	29	14	15	94	97	48	48	17	23	2.783	2.185	3.994	1.877	2.195	1.033	3.182	2.919	N	N	0
I	66	M	29.6	152	99	4	N	28	13	21	91	98	44	50	46	17	3.45	1.957	1.978	1.062	3.017	0.708	1.757	1.237	N	N	0
C	80	F	23.6	118	71	6	Y	27	14	15	94	95	38	42	26	23	3.413	3.112	1.383	2.009	1.162	1.117	4.037	3.953	Y	Y	2
C	61	M	27.5	164	84	6	N	23	13	14	94	96	47	48	41	39	4.212	2.443	2.73	1.595	2.019	1.093	3.065	2.332	N	N	0
I	70	M	22.9	152	88	5	Y	25	13	17	95	97	50	51	45	37	4.033	2.123	3.101	1.298	1.208	0.695	1.96	1.38	N	N	0
C	68	M	26.7	144	87	6	N	27	13	13	94	97	45	46	27	23	3.789	3.348	3.116	2.009	1.389	1.067	2.838	1.816	N	N	0
I	74	F	26.1	155	65	7	N	27	11	16	94	100	49	50	14	23	4.167	2.042	2.975	1.657	1.984	1.247	1.457	1.434	N	N	0
C	77	F	27.6	152	65	7	Y	27	9	4	94	98	53	53	29	37	4.11	2.236	2.359	2.053	0.483	0.942	2.635	2.382	Y	Y	2
I	68	M	18.9	156	89	3	N	29	14	14	88	88	45	48	12	36	4.304	1.929	2.813	1.849	2.282	0.866	1.209	1.791	N	N	0
C	75	F	23.9	153	90	8	N	24	9	13	94	94	46	50	36	15	4.208	3.086	1.23	1.925	2.074	1.531	2.631	1.683	N	N	0
C	70	F	25.3	157	85	8	N	26	19	5	94	94	46	46	40	31	3.96	3.023	2.083	1.832	1.028	0.042	2.122	3.038	N	N	0
C	75	F	29.2	151	92	8	Y	29	14	14	94	97	44	47	41	32	2.882	2.678	3.375	1.889	0.207	0.183	2.258	2.053	Y	Y	3
I	61	M	23.3	140	89	10	N	27	12	10	94	100	36	45	28	23	2.213	2.585	3.898	0.393	2.872	1.061	2.538	1.502	N	N	0
C	67	M	20.6	164	98	2	N	29	9	20	93	95	44	48	38	25	3.731	3.288	3.2	1.838	1.078	1.832	2.492	2.041	N	N	0
I	64	M	18.5	151	68	3	N	28	11	18	93	97	43	51	30	36	4.913	1.533	2.922	2.392	0.468	0.309	4.142	2.338	N	N	0
I	60	M	19.1	123	87	5	N	28	17	15	91	94	43	47	36	21	2.936	2.446	2.557	1.272	0.712	0.395	3.039	1.525	N	N	0
I	71	F	23.7	129	75	4	N	25	7	5	93	94	45	50	36	24	2.917	1.967	2.107	1.656	1.039	0.891	3.113	2.636	N	N	0
C	76	F	24.3	162	81	4	Y	27	10	12	92	92	44	48	49	11	4.097	2.722	3.904	1.848	1.021	0.748	2.083	1.382	Y	Y	2
I	69	M	18.7	151	89	5	N	24	11	13	93	98	48	54	39	29	2.873	2.088	3.19	1.328	2.661	0.64	2.244	2.297	N	N	0
I	70	M	19.9	136	76	5	N	27	7	12	93	94	38	46	28	36	3.66	2.203	1.958	0.435	3.246	0.833	2.752	2.301	N	N	0
C	67	M	21.5	138	85	5	N	29	18	21	93	95	52	56	31	35	3.048	3.072	1.776	1.812	2.151	0.755	2.652	1.526	N	N	0
I	79	F	27.3	137	99	3	Y	28	14	14	89	92	42	50	24	15	3.698	2.429	2.615	2.018	1.976	0.706	2.151	1.319	Y	N	3
I	70	M	26.2	142	97	6	N	25	16	18	93	95	38	51	36	40	2.466	2.279	2.504	0.913	3.301	1.296	2.308	1.595	N	N	0
I	62	M	26.7	144	68	6	N	28	11	10	93	94	52	56	32	24	4.047	2.176	2.289	1.36	2.144	1.003	3.184	1.936	N	N	0
C	75	F	22.4	153	77	3	Y	27	19	12	89	91	47	52	32	22	3.408	3.05	2.52	1.767	2.605	1.455	1.284	0.617	Y	N	1
I	60	M	25.7	150	82	8	N	29	11	13	93	93	41	51	28	10	2.774	2.319	2.194	1.742	0.688	0.327	0.705	1.07	N	N	0
I	75	F	26.6	130	82	8	Y	27	8	10	93	95	44	51	32	23	1.052	2.472	2.232	0.678	1.789	1.209	1.738	1.502	Y	Y	3
C	71	F	19.6	153	79	8	N	27	3	16	93	94	30	43	22	31	3.786	2.633	2.946	1.803	0.63	0.387	3.083	1.819	N	N	0
C	60	M	24	130	76	9	N	30	11	13	93	94	45	48	43	29	4.066	2.247	1.19	1.751	3.461	1.871	1.457	0.922	N	N	0
I	70	F	24.9	159	86	2	Y	28	9	5	92	95	45	48	40	21	5.881	2.864	1.668	0.516	0.924	0.904	1.896	1.734	Y	N	3
C	68	M	21.7	125	81	4	N	27	16	17	95	100	46	51	45	26	3.852	2.32	1.622	2.116	1.386	1.036	3.722	3.884	N	N	0
I	63	F	21.4	158	99	3	N	28	10	12	92	94	51	56	29	25	3.577	2.101	3.389	1.242	3.051	0.575	3.504	1.941	N	N	0
I	79	F	24.6	144	79	3	Y	30	13	9	92	100	40	50	34	15	5.529	1.7	2.143	2.126	1.053	1.005	1.984	1.795	Y	Y	2
C	73	F	22.2	140	99	3	Y	28	7	13	92	94	43	43	39	42	3.568	3.091	2.051	2.019	1.122	0.721	2.407	2.421	N	N	0
I	75	F	20	156	80	8	Y	28	7	21	96	100	53	51	32	12	3.576	2.22	3.247	2.033	1.434	0.72	3.155	2.277	N	N	0
I	65	M	19.5	131	99	4	Y	30	14	12	92	92	36	44	35	27	4.561	1.899	3.622	0.671	3.163	1.099	2.786	1.992	N	N	0
I	75	F	29.2	161	84	4	Y	25	10	16	92	100	42	49	18	24	4.236	2.55	1.943	1.205	1.013	0.776	1.391	1.466	N	N	0
C	80	M	30.5	119	84	4	Y	25	11	13	92	92	52	52	34	9	3.834	2.75	2.5	1.858	0.322	1.973	3.23	3.24	Y	Y	2
I	78	F	22.3	144	92	8	Y	25	14	8	94	96	49	49	38	25	5.812	2.454	2.05	1.671	2.074	0.627	3.255	1.426	N	N	0
C	61	M	25.6	158	90	5	N	25	16	16	92	93	46	49	33	14	3.704	2.515	3.948	2.091	1.893	0.933	1.884	1.651	N	N	0
C	80	F	27.9	143	75	5	Y	30	13	11	92	99	42	43	43	9	4.123	2.749	2.111	1.842	0.461	0.446	2.52	1.778	Y	Y	2
I	69	F	25.3	142	82	7	N	27	11	14	92	95	42	52	30	10	3.819	2.408	3.216	1.327	2.144	0.927	1.902	1.743	N	N	0
C	69	F	24.3	157	87	7	Y	26	10	18	92	94	41	50	26	28	3.782	2.221	2.729	1.855	1.194	1.242	2.461	2.621	Y	N	2
I	68	M	19.9	146	81	3	N	27	4	13	94	98	47	54	27	18	3.376	1.417	2.881	0.878	0.694	0.532	1.787	1.86	N	N	0
C	63	M	24.2	147	74	9	N	27	16	15	92	94	51	52	32	33	3.566	3.362	2.358	1.885	0.595	0.041	2.264	1.904	N	N	0
I	68	M	23.6	154	99	1	N	27	14	15	91	94	49	49	18	28	3.14	2.297	2.164	1.236	1.798	1.053	2.439	2.19	N	N	0
C	70	F	25.4	129	70	1	N	28	12	8	91	91	35	44	33	36	3.802	2.135	1.62	1.783	1.967	1.582	2.828	2.693	N	N	0
C	64	M	22.7	148	73	3	N	30	10	17	91	93	48	49	26	34	3.539	2.305	1.667	1.703	2.086	1.501	2.015	2.735	N	N	0
I	64	M	22.4	133	86	4	N	29	9	11	93	95	45	46	35	8	2.026	2.532	2.774	1.876	3.799	0.848	3.117	1.942	N	N	0
C	62	M	23.5	144	82	4	N	29	8	14	91	92	47	51	21	24	3.606	3.112	2.633	1.959	1.05	0.917	2.984	2.895	N	N	0
C	66	M	23.6	157	65	4	N	25	14	6	91	93	51	51	30	11	3.786	2.858	2.545	1.66	0.265	0.747	2.715	1.197	N	N	0
I	68	F	22.8	135	69	5	N	25	12	10	91	93	44	46	32	19	4.225	2.827	2.188	1.677	1.481	1.252	3.255	1.711	N	N	0
C	79	M	27.4	157	82	5	Y	30	14	6	93	91	42	54	31	37	4.054	2.295	2.203	1.809	2.37	0.987	2.804	1.521	Y	Y	1
I	64	M	24.3	113	82	6	N	27	7	19	91	100	49	52	40	29	2.629	1.254	2.57	1.052	1.668	0.47	3.557	2.851	N	N	0
C	72	M	23.6	160	66	6	N	27	8	18	91	91	54	55	22	29	3.108	2.716	2.246	1.849	1.487	0.738	1.981	2.602	N	N	0
C	76	F	20	162	92	4	Y	29	11	7	97	97	45	50	34	30	3.054	3.336	4.357	1.667	1.083	1.475	2.583	2.39	N	N	0
I	77	F	28.4	158	84	9	Y	27	9	9	91	98	44	48	43	28	4.471	2.181	3.032	2.167	1.647	1.36	1.512	1.347	N	N	0
I	75	F	25.6	159	75	4	Y	27	15	16	90	95	39	47	41	29	3.364	2.608	2.23	0.171	2.416	0.673	2.356	1.778	N	N	0
C	73	F	21.9	152	95	4	N	27	3	13	90	91	43	46	15	31	3.923	2.916	1.579	1.779	3.484	1.096	1.692	2.337	N	N	0
C	74	F	23.7	157	81	6	N	27	16	6	94	94	45	51	32	21	3.732	2.787	2.429	1.893	1.495	1.01	2.609	2.438	N	N	0
I	70	M	24.9	150	73	7	Y	24	7	13	90	90	38	49	22	29	3.213	2.139	2.654	1.213	1.088	1.004	1.959	1.767	N	N	0
I	80	F	29.6	116	87	8	Y	25	11	17	90	95	36	51	28	14	3.965	2.602	2.79	0.015	1.366	0.74	0.935	1.129	Y	N	2
C	66	M	22.7	149	81	8	N	29	10	11	97	92	52	53	25	23	2.711	3.064	2.674	1.728	0.216	0.724	2.35	0.911	N	N	0
I	85	M	27.6	163	72	9	Y	28	8	20	90	96	43	50	35	25	2.812	1.905	2.605	1.748	1.04	0.607	2.055	1.501	Y	Y	2
I	67	M	19.4	123	86	9	Y	27	6	21	90	99	44	51	39	39	2.401	2.102	2.167	0.511	0.833	0.856	3.185	1.611	N	N	0
C	69	M	26.9	150	87	4	N	28	17	7	93	94	44	56	26	24	2.894	2.72	2.15	1.658	3.632	1.378	2.136	1.504	N	N	0
C	68	M	25.6	144	72	3	N	26	16	11	96	96	45	45	15	35	3.233	3.077	1.727	1.487	1.912	0.609	2.349	1.56	N	N	0
I	79	M	18.7	157	81	4	Y	29	11	9	95	95	40	51	23	30	4.747	2.126	2.573	1.152	1.125	0.643	1.242	1.766	Y	Y	3
C	75	F	26.6	161	88	6	Y	28	12	14	95	97	47	53	24	28	3.877	2.752	2.345	1.719	1.466	0.607	2.327	2.804	Y	Y	3
C	64	M	26.8	153	75	8	N	27	2	14	92	92	42	43	27	33	2.568	2.816	2.579	2.021	1.076	1.013	2.765	2.653	N	N	0
